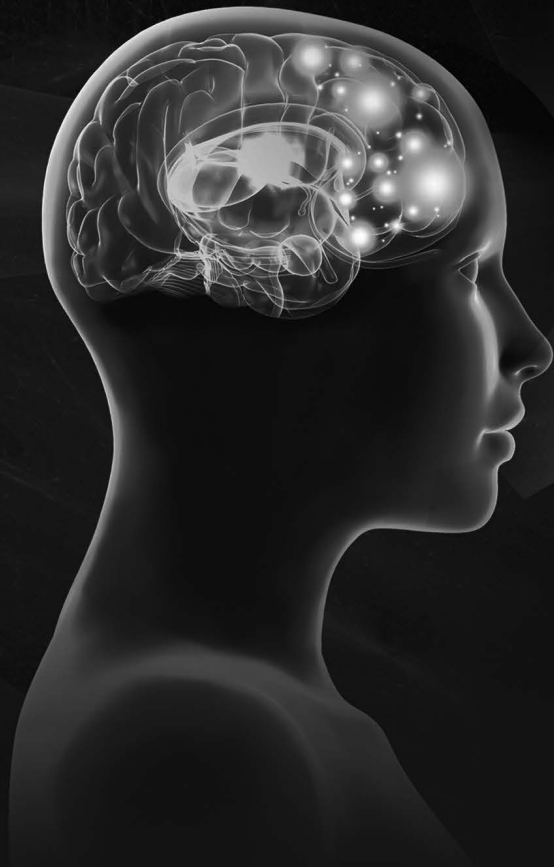

Easily Measure  
Executive Function

# Strengths & Weaknesses

with the

**CEFI Adult**<sup>TM</sup>  
COMPREHENSIVE EXECUTIVE FUNCTION INVENTORY ADULT

**Executive function skills are important for problem solving, reasoning, and adaptive behavior. Impairment in executive function can often make simple tasks problematic.**

With the brand new **CEFI Adult** you will be able to:

- Measure executive function in adults 18 and older
- Quickly assess executive function
- Use the CEFI Adult's nine comprehensive scales to guide targeted interventions
- Trust the new easy to understand reports including interpretative, comparative and progress reports
- Rely on highly accurate results based on extensive norming

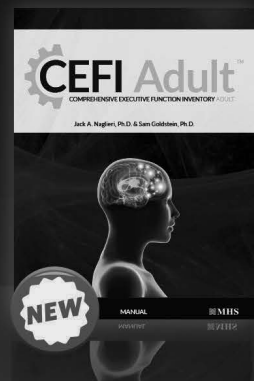

Available **SUMMER 2017**

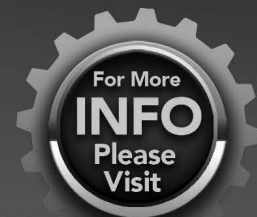

[MHS.com/CEFIadult](http://MHS.com/CEFIadult)

**MHS**<sup>®</sup>  
ASSESSMENTS

*G&N*<sup>®</sup>  
Goldstein & Naglieri  
Excellence  
in Assessment

**SPANISH**  
español  
Available

# The Journal of Neuropsychiatry and Clinical Neurosciences

Official Journal of the American Neuropsychiatric Association

## Editorial Board

The *Journal of Neuropsychiatry and Clinical Neurosciences* (ISSN 0895-0172), is published quarterly by the American Psychiatric Association (APA), 1000 Wilson Blvd., Suite 1825, Arlington, VA 22209. Copyright © 2017 American Psychiatric Association. The *Journal of Neuropsychiatry and Clinical Neurosciences* is protected by copyright and may not be reproduced in any manner without written permission. The *Journal* is abstracted/indexed in *Chemical Abstracts*, *Current Contents/Clinical Medicine*®, *EMBASE/Excerpta Medica*, *Index Medicus/MEDLINE/MEDLARS*, *PsycINFO*, *Psychological Abstracts*, *Research Alert*®, and *Sci Search*®. It is available through University Microfilms, Inc., 300 North Zeeb Road, Ann Arbor, MI 48106, in microform, electronic, or paper format.

Manuscript submissions should no longer be sent by mail. Please visit <http://mc.manuscriptcentral.com> to upload a paper online.

U.S. individual subscriptions are \$270 per year for 4 issues (\$216 for APA members); international subscriptions are \$408 per year (\$243 for online only). APA International Members receive a 20% discount off the online only rate for an individual online subscription. Institutional subscriptions are tier priced. For institutional site license information and pricing, please email us at [appi@psych.org](mailto:appi@psych.org), call (800) 368-5777 or visit [www.appi.org/ForLibrarians/](http://www.appi.org/ForLibrarians/).

Advertising inquiries may be directed to Tim Wolfinger at PMI, 30 East 33rd St., New York, NY 10016; (212) 904-0379; [twolfinger@pminy.com](mailto:twolfinger@pminy.com).

APA is not responsible for statements made in this publication by contributors or advertisers. Unless stated, material in the *Journal of Neuropsychiatry and Clinical Neurosciences* does not reflect the endorsement, official attitude, or position of APA or the American Neuropsychiatric Association.

Periodicals postage paid at Arlington, VA, and additional mailing offices. POSTMASTER: Send address changes to the *Journal of Neuropsychiatry and Clinical Neurosciences*, 1000 Wilson Blvd., Suite 1825, Arlington, VA 22209.

### Editor

David B. Arciniegas, M.D.

### Editor Emeritus

Stuart C. Yudofsky, M.D.

### Deputy Editor

C. Alan Anderson, M.D.

### Assistant to the Editors

T. Angelita Garcia, M.B.A.

### Consulting Editors

C. Edward Coffey, M.D.  
Thomas W. McAllister, M.D.  
Henry Nasrallah, M.D.  
Fred Ovsiew, M.D.  
Jonathan M. Silver, M.D.

### Associate Editors

Sheldon Benjamin, M.D.  
Kevin J. Black, M.D.  
Nashaat N. Boutros, M.D.  
John J. Campbell, M.D.  
Miles Cunningham, M.D.  
Michael Ebert, M.D.  
Richard B. Ferrell, M.D.  
Laura A. Flashman, Ph.D.  
Yonas E. Geda, M.D.  
Daniel I. Kaufer, M.D.  
W. Curt LaFrance, M.D.  
Edward C. Lauterbach, M.D.  
Mario Mendez, M.D., Ph.D.  
Charles Nemeroff, M.D., Ph.D.  
Trevor R. P. Price, M.D.  
Robert G. Robinson, M.D.  
David A. Silbersweig, M.D.  
Robert Stern, Ph.D.  
Kaloyan S. Tanev, M.D.  
Paula T. Trzepacz, M.D.  
Hal S. Wortzel, M.D.

### Neuropsychiatry Classics Editor

Thomas C. Neylan, M.D.

### Book Review Editor

Michael Schrift, D.O., M.A.

### Windows to the Brain Editors

Robin A. Hurley, M.D.  
L. Anne Hayman, M.D.  
Katherine H. Taber, Ph.D.

### American Psychiatric Association Publishing

John McDuffie  
*Interim Publisher*

Michael Roy  
*Editorial Director, Journals*

Angela Moore  
*Editorial Manager*

Susan Westrate  
*Production Manager, Journals*

Heidi Koch  
*Editorial Support Services Manager*

Patrick Hansard  
*Director of Marketing and Sales*

AMERICAN  
PSYCHIATRIC  
ASSOCIATION  
PUBLISHING

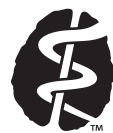

Please visit the Journal's website at [neuro.psychiatryonline.org](http://neuro.psychiatryonline.org)

# The *Journal of Neuropsychiatry and Clinical Neurosciences* Announces New Article Types: **Submissions Welcome!**

JNCN has added several new article types to meet the needs of the field and stimulate commentary:

- **Treatment in Behavioral Neurology & Neuropsychiatry:** Using idealized clinical vignettes and high-level scholarship, these papers highlight issues in treatment that are frequently encountered but widely recognized as therapeutically, ethically, or administratively challenging.
- **Education in Behavioral Neurology & Neuropsychiatry:** Articles present, evaluate, and discuss educational methods, programs, and outcomes in neuropsychiatry education at the undergraduate medical, graduate medical, and/or postgraduate medical levels.
- **Analysis and Commentary:** Contributions present (a) focused analyses of and commentary on an article (or several related articles) on clinically important or controversial topics in neuropsychiatry that have been published recently in peer-reviewed clinical neuroscience journals (including, but not limited to, *JNCN*), with the aim of contextualizing, interpreting, or reconciling divergent findings, interpretations, and perspectives presented in those articles or (b) expert commentary on highly salient or controversial topics and articles in neuropsychiatry, where “expert” is defined by having published no fewer than five or more peer-reviewed articles that are directly relevant to the focus of the analysis and commentary.
- **Perspectives in Global Neuropsychiatry:** These articles offer insights into the practice of neuropsychiatry worldwide by describing the neuropsychiatric presentation, diagnosis, and treatment of a typical patient in a specific region or country and by highlighting the unique cultural, economic, political, and other issues that influence neuropsychiatric assessment and treatment in that country or region.
- **Icons in Neuropsychiatry:** This type of article offers historical or contemporary snapshots of neuropsychiatry’s practitioners or other images of interest (e.g., art, historic buildings, books, or monographs) to the journal’s readership and briefly describes their relevance to the field today.
- **Opinion:** These brief essays address important topics in neuropsychiatric practice, research, public health, health policy, health legislation, or ethics and generally are not commentaries on a specific article.
- **Introspections:** These works feature personal vignettes describing experiences in neuropsychiatric practice, research, education, and professional or community service that have been particularly important personally or professionally with the goal of informing the personal or professional development and experience of the Journal’s readers.

For information on submission requirements, visit the *Journal's*  
Information for Authors and Reviewers:

[http://neuro.psychiatryonline.org/neuro\\_authors\\_reviewers](http://neuro.psychiatryonline.org/neuro_authors_reviewers)
