SUMMER 2017 | VOLUME 29 | NUMBER 3

# The Journal of Neuropsychiatry

## and Clinical Neurosciences

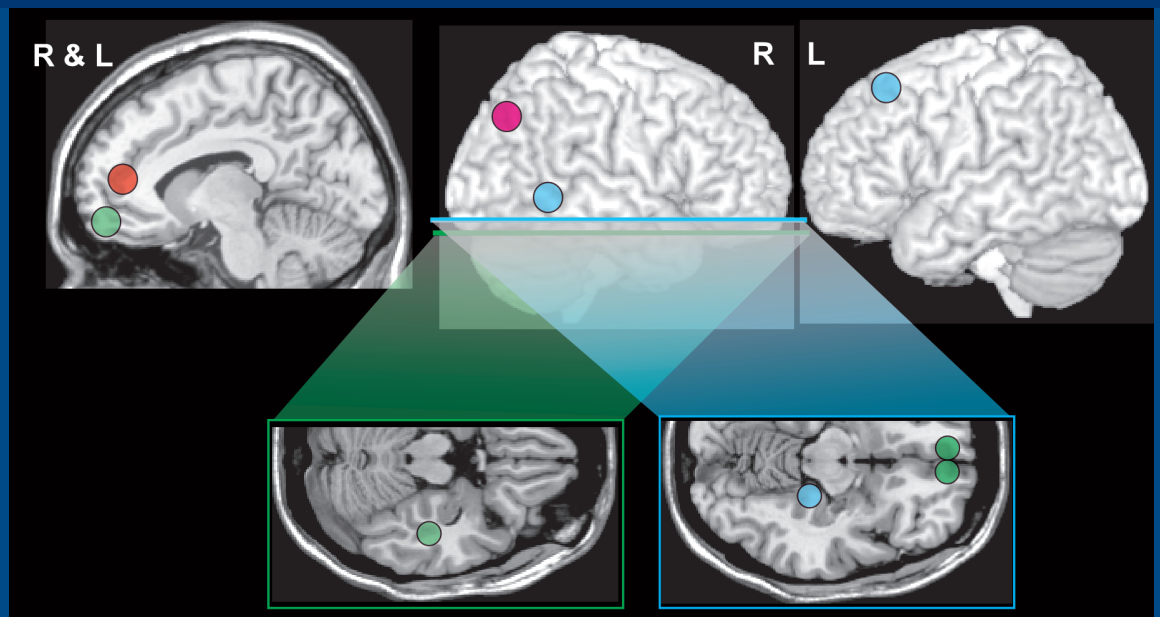

Borderline Personality Disorder: Neurobiological  
Contributions to Remission and Recovery

Psychiatric Presentations of *C9orf72* Mutation: What Are the  
Diagnostic Implications for Clinicians?

Predictors of Major Depression and Posttraumatic Stress Disorder  
Following Traumatic Brain Injury: A Systematic Review and Meta-Analysis

Focal Changes to Human Electroencephalography With Drowsiness:  
A Novel Measure of Local Sleep

Traumatic Brain Injury in Iraq and Afghanistan Veterans:  
New Results From a National Random Sample Study

Official Journal of the American Neuropsychiatric Association  
[neuro.psychiatryonline.org](http://neuro.psychiatryonline.org)
